# Supplementary material for: TYK2 signaling promotes the development of autoreactive CD8+ cytotoxic T lymphocytes and type 1 diabetes
Source: PubMed Central journal article supplement (PMC10864272; doi:10.1038/s41467-024-45573-9), 2024-02-13
Supplement: 41467_2024_45573_MOESM1_ESM.pdf [file 41467_2024_45573_MOESM1_ESM.pdf]

# **TYK2 signaling promotes the development of autoreactive CD8<sup>+</sup> cytotoxic T lymphocytes and type 1 diabetes**

## **Authors:**

Keiichiro Mine<sup>1,2,\*</sup>, Seiho Nagafuchi<sup>1</sup>, Satoru Akazawa<sup>3</sup>, Norio Abiru<sup>3,4</sup>, Hitoe Mori<sup>1</sup>, Hironori Kurisaki<sup>5</sup>, Kazuya Shimoda<sup>6</sup>, Yasunobu Yoshikai<sup>2</sup>, Hirokazu Takahashi<sup>1,7</sup>, and Keizo Anzai<sup>1</sup>

## **Affiliations:**

<sup>1</sup>Division of Metabolism and Endocrinology, Faculty of Medicine, Saga University, Saga, Japan.

<sup>2</sup>Division of Host Defense, Medical Institute of Bioregulation, Kyushu University, Fukuoka, Japan.

<sup>3</sup>Department of Endocrinology and Metabolism, Unit of Translational Medicine, Nagasaki University Graduate School of Biomedical Sciences, Nagasaki, Japan.

<sup>4</sup>Midori Clinic, Nagasaki, Japan.

<sup>5</sup>Department of Medical Science and Technology, Graduate School of Medical Sciences, Kyushu University, Fukuoka, Japan

<sup>6</sup>Division of Hematology, Diabetes, and Endocrinology, Department of Internal Medicine, Faculty of Medicine, University of Miyazaki, Miyazaki, Japan

<sup>7</sup>Liver Center, Saga University Hospital, Saga University, Saga, Japan.

## **Table of Contents:**

|                             |    |
|-----------------------------|----|
| Supplementary Figure 1..... | 2  |
| Supplementary Figure 2..... | 4  |
| Supplementary Figure 3..... | 6  |
| Supplementary Figure 4..... | 8  |
| Supplementary Figure 5..... | 9  |
| Supplementary Figure 6..... | 11 |
| Supplementary Figure 7..... | 13 |
| Supplementary Table 1.....  | 15 |

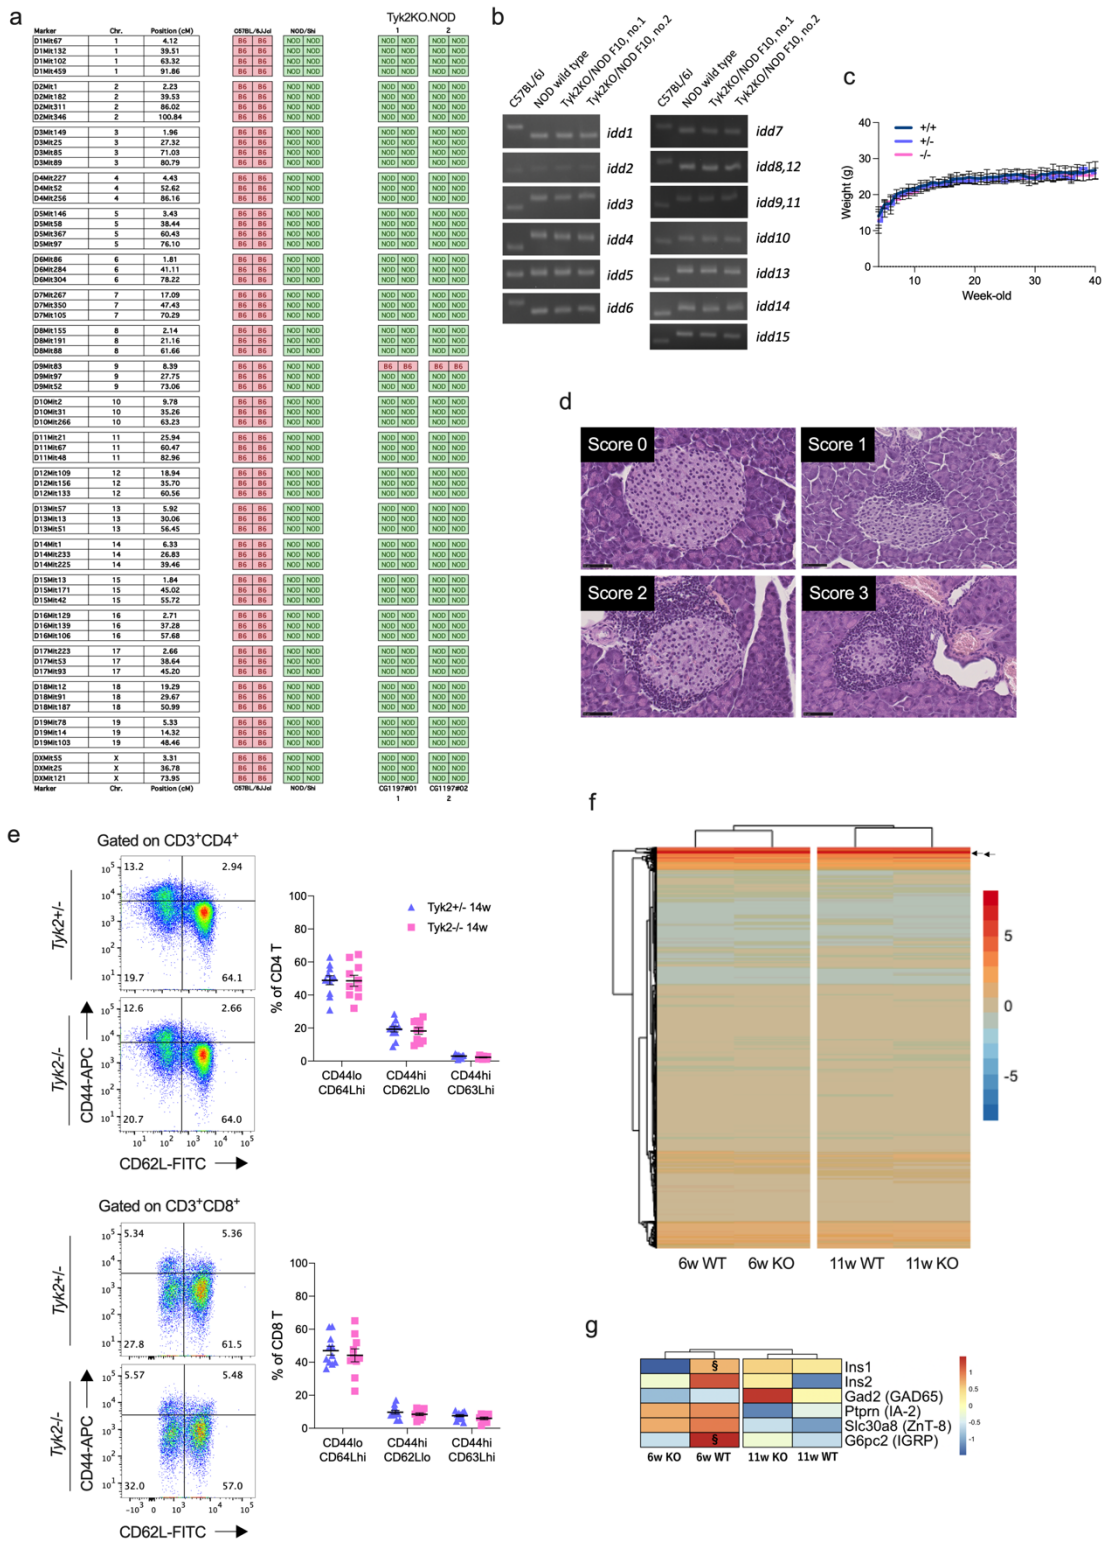

**Supplementary Figure 1. Establishing *Tyk2*KO.NOD mice and the analysis of purified  $\beta$ -cells.**

**a** Analysis report of 64 short tandem repeat (STR) loci in *Tyk2*KO.NOD mice. **b** PCR analysis of STRs at the IDDM loci in *Tyk2*KO.NOD mice (Idd1 to Idd15). **c** Body weight gain in *Tyk2*<sup>+/+</sup> (n=14), *Tyk2*<sup>+/-</sup>

(n=10), and *Tyk2*<sup>-/-</sup> NOD female mice (n=13). Diabetic mice were excluded. **d** Representative hematoxylin and eosin staining of islets with or without insulinitis. Score 0, no insulinitis; Score 1, peri-insulinitis; Score 2, infiltrative insulinitis less than 50% of the islet area; and Score 3, infiltrative insulinitis more than 50% of the islet area. Bar, 50 $\mu$ m. **e** (Left) Representative flow cytometry plots and (right) graphs show the frequency of naïve (CD44<sup>lo</sup> CD62L<sup>+</sup>), effector memory (CD44<sup>hi</sup> CD62L<sup>-</sup>), and central memory (CD44<sup>hi</sup> CD62L<sup>+</sup>) in CD3<sup>+</sup> CD4<sup>+</sup> or CD3<sup>+</sup> CD8<sup>+</sup> splenocytes from *Tyk2*<sup>+/-</sup> (n=11) or *Tyk2*<sup>-/-</sup> (n=10) 14w mice. **f** Heatmap of the whole set of genes in purified  $\beta$ -cells. The arrows indicate the *Ins1* and *Ins2* genes, confirming the characteristics of  $\beta$ -cells. **g** Heatmap of the selected genes associated with islet autoantigens in purified  $\beta$ -cells. Criteria used to identify differentially expressed genes were as follows: upregulated genes, Z score > 2.0 and ratio < 1.5; downregulated genes, Z score < -2.0 and ratio > 0.66. *P*-values were calculated using two-tailed Student's *t*-tests (e). Data represent the mean  $\pm$  SEM.

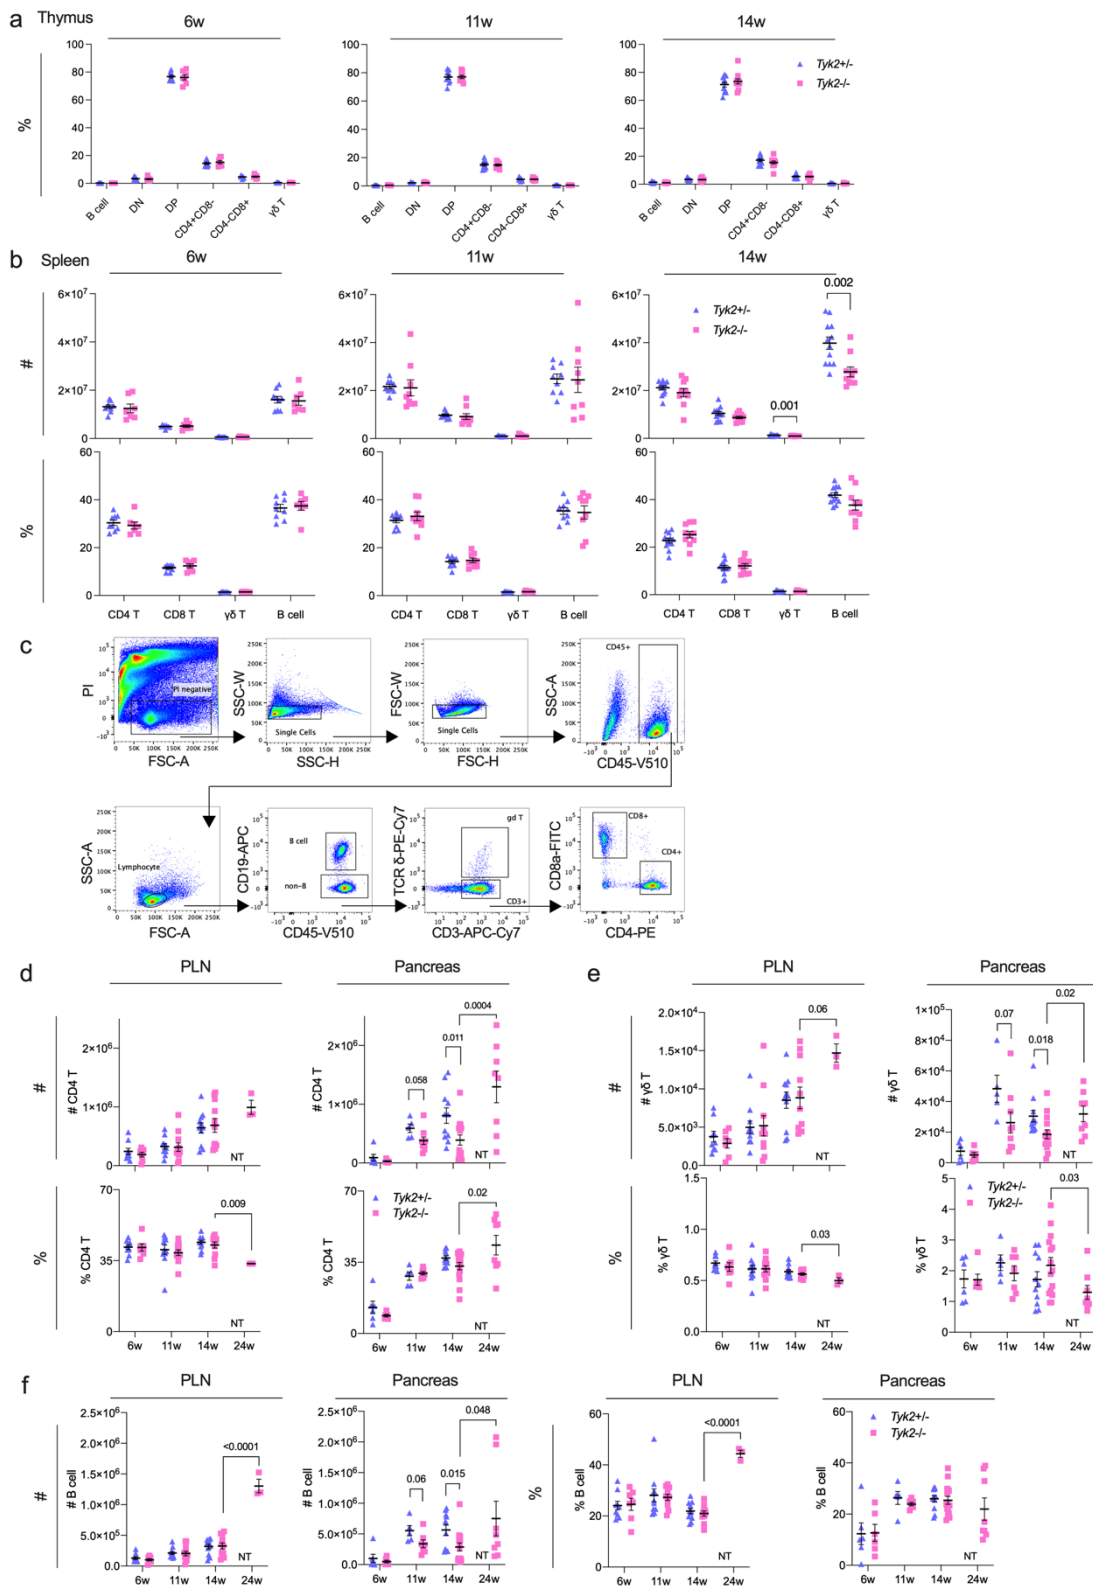

**Supplementary Figure 2. Immune cell profiles in the thymus, spleen, PLN, and pancreas.**

**a** Frequencies of the indicated immune cells in the thymi of 6w (*Tyk2*<sup>+/-</sup>, n=9; *Tyk2*<sup>-/-</sup>, n=7), 11w (*Tyk2*<sup>+/-</sup>,

n=9; *Tyk2*<sup>-/-</sup>, n=9), and 14w (*Tyk2*<sup>+/-</sup>, n=11; *Tyk2*<sup>-/-</sup>, n=11) female NOD mice. **b** Cell number (#) or frequency among CD45<sup>+</sup> cells (%) of the indicated immune cells in the spleens of 6w (*Tyk2*<sup>+/-</sup>, n=9; *Tyk2*<sup>-/-</sup>, n=7), 11w (*Tyk2*<sup>+/-</sup>, n=9; *Tyk2*<sup>-/-</sup>, n=9), and 14w (*Tyk2*<sup>+/-</sup>, n=12; *Tyk2*<sup>-/-</sup>, n=10) NOD mice. **c** Gating strategy for the analysis of immune cells in the pancreas. The method described in the Materials and Methods section preserves the epitope integrity in immune cells derived from the pancreas. **d, e, and f** Cell number (#) or frequency among CD45<sup>+</sup> cells (%) of CD4<sup>+</sup> T cells (d),  $\gamma\delta$  T cells (e), and B cells (f) in the PLN of 6w (*Tyk2*<sup>+/-</sup>, n=9; *Tyk2*<sup>-/-</sup>, n=7), 11w (*Tyk2*<sup>+/-</sup>, n=11; *Tyk2*<sup>-/-</sup>, n=11), 14w (*Tyk2*<sup>+/-</sup>, n=11; *Tyk2*<sup>-/-</sup>, n=11), and normoglycemic 24w (*Tyk2*<sup>-/-</sup>, n=3) NOD mice and pancreas of 6w (*Tyk2*<sup>+/-</sup>, n=6; *Tyk2*<sup>-/-</sup>, n=6), 11w (*Tyk2*<sup>+/-</sup>, n=5; *Tyk2*<sup>-/-</sup>, n=9), 14w (*Tyk2*<sup>+/-</sup>, n=11; *Tyk2*<sup>-/-</sup>, n=15), and normoglycemic 24w (*Tyk2*<sup>-/-</sup>, n=8) NOD mice. *P*-values were calculated using two-tailed Student's *t*-tests (a, b, d-f). Data represent the mean  $\pm$  SEM.

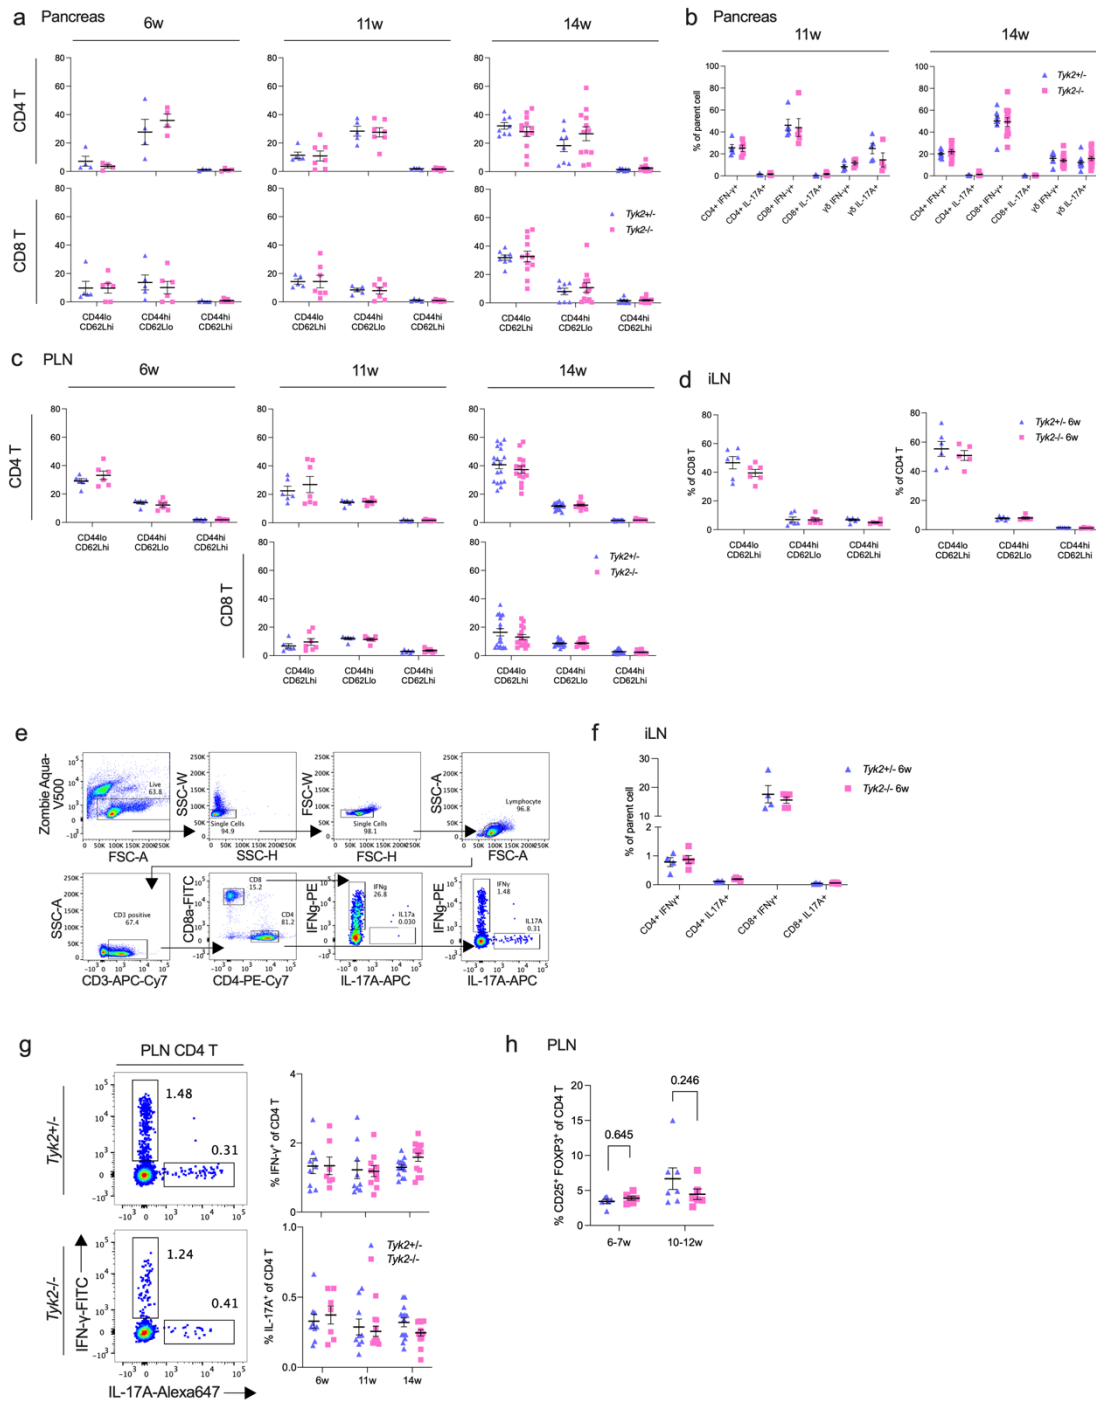

**Supplementary Figure 3. Characteristics of CD4<sup>+</sup> and CD8<sup>+</sup> T cells in the PLN and pancreas.**

**a** Frequency of naïve (CD44<sup>lo</sup> CD62L<sup>+</sup>), effector memory (CD44<sup>hi</sup> CD62L<sup>-</sup>), and central memory (CD44<sup>hi</sup> CD62L<sup>+</sup>) CD4<sup>+</sup> T cells in the pancreas in 6w (*Tyk2*<sup>+/-</sup>, n=4; *Tyk2*<sup>-/-</sup>, n=4), 11w (*Tyk2*<sup>+/-</sup>, n=5; *Tyk2*<sup>-/-</sup>, n=7), and 14w (*Tyk2*<sup>+/-</sup>, n=8; *Tyk2*<sup>-/-</sup>, n=12) NOD mice and CD8<sup>+</sup> T cells in the pancreas of 6w (*Tyk2*<sup>+/-</sup>, n=5; *Tyk2*<sup>-/-</sup>, n=6), 11w (*Tyk2*<sup>+/-</sup>, n=5; *Tyk2*<sup>-/-</sup>, n=7), and 14w (*Tyk2*<sup>+/-</sup>, n=8; *Tyk2*<sup>-/-</sup>, n=12) NOD mice. **b** Frequency of IFN- $\gamma$  or IL-17A-producing cells upon PMA/Iono stimulation in the pancreas

of 11w (*Tyk2*<sup>+/-</sup>, n=5; *Tyk2*<sup>-/-</sup>, n=4 or 5) and 14w NOD mice (*Tyk2*<sup>+/-</sup>, n=8 or 11; *Tyk2*<sup>-/-</sup>, n=12 or 15). **c** Frequency of naïve (CD44<sup>lo</sup> CD62L<sup>+</sup>), effector memory (CD44<sup>hi</sup> CD62L<sup>-</sup>) and central memory (CD44<sup>hi</sup> CD62L<sup>+</sup>) CD4<sup>+</sup> T cells in the PLN of 6w (*Tyk2*<sup>+/-</sup>, n=6; *Tyk2*<sup>-/-</sup>, n=6), 11w (*Tyk2*<sup>+/-</sup>, n=6; *Tyk2*<sup>-/-</sup>, n=7), and 14w (*Tyk2*<sup>+/-</sup>, n=18; *Tyk2*<sup>-/-</sup>, n=15) NOD mice and CD8<sup>+</sup> T cells in the PLN of 11w (*Tyk2*<sup>+/-</sup>, n=6; *Tyk2*<sup>-/-</sup>, n=7) and 14w (*Tyk2*<sup>+/-</sup>, n=18; *Tyk2*<sup>-/-</sup>, n=15) NOD mice. **d** Frequency of naïve (CD44<sup>lo</sup> CD62L<sup>+</sup>), effector memory (CD44<sup>hi</sup> CD62L<sup>-</sup>), and central memory (CD44<sup>hi</sup> CD62L<sup>+</sup>) CD8<sup>+</sup> T cells in the iLN of 6w NOD mice (*Tyk2*<sup>+/-</sup>, n=6; *Tyk2*<sup>-/-</sup>, n=6), and CD4<sup>+</sup> T cells in the iLN of 6w NOD mice (*Tyk2*<sup>+/-</sup>, n=6; *Tyk2*<sup>-/-</sup>, n=5). **e** Gating strategy for the analysis of IFN- $\gamma$  or IL-17A-producing cells upon PMA/Iono stimulation. **f** Frequency of IFN- $\gamma$  or IL-17A-producing cells upon PMA/Iono stimulation in the iLN of 6w NOD mice (*Tyk2*<sup>+/-</sup>, n=4; *Tyk2*<sup>-/-</sup>, n=5). **g** (Left) Representative flow cytometry plots of 6w NOD mice and (right) frequency of IFN- $\gamma$  and IL-17-producing CD4<sup>+</sup> T cells upon PMA/Iono stimulation in the PLN of mice at the indicated ages. **h** Frequency of Tregs in the PLN of 6–7w (*Tyk2*<sup>+/-</sup>, n=6; *Tyk2*<sup>-/-</sup>, n=6) and 10–12w (*Tyk2*<sup>+/-</sup>, n=7; *Tyk2*<sup>-/-</sup>, n=6) NOD mice. *P*-values were calculated using two-tailed Student's *t*-tests (a-d, and f-h). Data represent the mean  $\pm$  SEM.

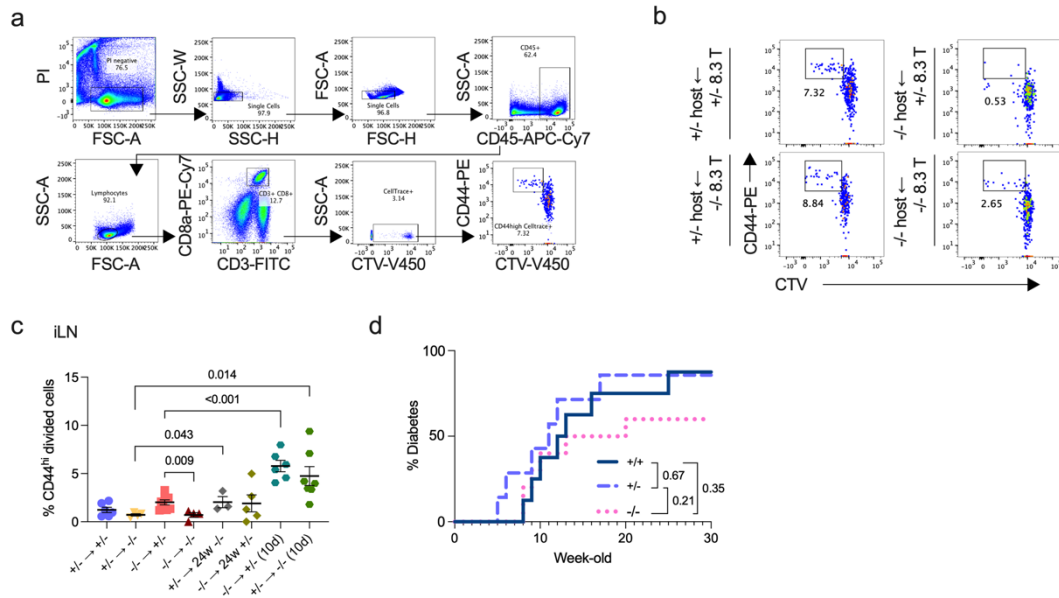

**Supplementary Figure 4. The proliferation of 8.3 CD8<sup>+</sup> T cells and diabetes incidence in NY8.3 NOD mice.**

**a** Gating strategy for the analysis of CTV-positive 8.3 CD8<sup>+</sup> T cells. **b** Representative flow cytometry plots of *Tyk2*<sup>+/-</sup> or *Tyk2*<sup>-/-</sup> CTV-labeled 8.3 CD8<sup>+</sup> T cells in the PLN of indicated 6-9w recipient mice 5d post transfer. **c** Frequency of proliferating *Tyk2*<sup>+/-</sup> or *Tyk2*<sup>-/-</sup> CTV-labeled 8.3 CD8<sup>+</sup> T cells in the iLN of the indicated recipient mice after 5d or 10d post transfer: 4×10<sup>6</sup> labeled naïve 8.3 CD8<sup>+</sup> T cells were transferred into 6-8w recipient mice. “24w” indicates the age of the recipient mice. (*Tyk2*<sup>+/-</sup> → *Tyk2*<sup>+/-</sup>, n=6; *Tyk2*<sup>-/-</sup> → *Tyk2*<sup>+/-</sup>, n=8; *Tyk2*<sup>+/-</sup> → *Tyk2*<sup>-/-</sup>, n=4; *Tyk2*<sup>-/-</sup> → *Tyk2*<sup>-/-</sup>, n=4; *Tyk2*<sup>+/-</sup> → 24w *Tyk2*<sup>-/-</sup>, n=3; *Tyk2*<sup>-/-</sup> → 24w *Tyk2*<sup>+/-</sup>, n=5; *Tyk2*<sup>-/-</sup> → *Tyk2*<sup>+/-</sup> 10d, n=6; *Tyk2*<sup>+/-</sup> → *Tyk2*<sup>-/-</sup> 10d, n=6.) **d** Incidence of spontaneous diabetes in female NY8.3 *Tyk2*<sup>+/+</sup> (n=8), *Tyk2*<sup>+/-</sup> (n=7), and *Tyk2*<sup>-/-</sup> NOD mice (n=10). Diabetes was defined by a non-fasting blood glucose level exceeding 250 mg/dL. *P*-values were calculated using two-tailed Student’s *t*-tests (c) and log-rank test (d). Data represent the mean ± SEM.



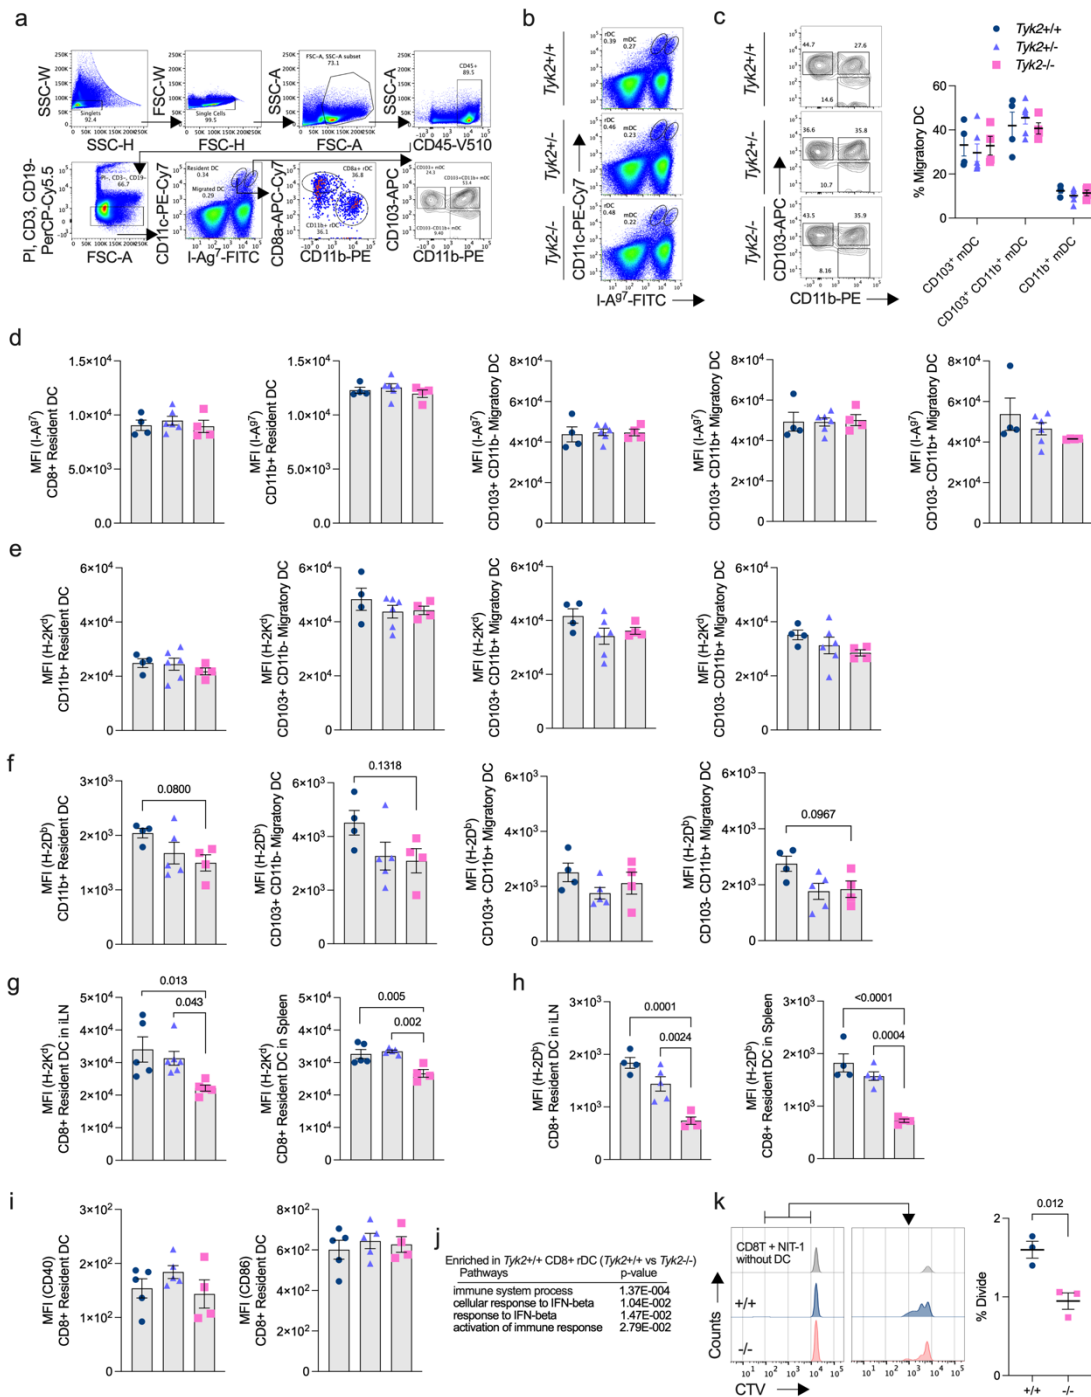

### Supplementary Figure 5. Characteristics of DCs in the PLN.

**a** Gating strategy for the analysis and sorting of DCs. **b** Representative flow cytometry plots of DCs (resident DC, MHC II<sup>mid</sup> CD11c<sup>hi</sup>, migratory DC, MHC II<sup>hi</sup> CD11c<sup>hi</sup>) in the PLN of 6w mice. rDCs are gated on MHC II<sup>mid</sup> CD11c<sup>hi</sup> cells and mDCs are gated on MHC II<sup>hi</sup> CD11c<sup>hi</sup> cells. **c** (Left) Representative flow cytometry plots of mDC in the PLN of 6w mice. (Right) The frequencies of CD103<sup>+</sup> CD11b<sup>-</sup> mDC, CD103<sup>+</sup> CD11b<sup>+</sup> mDC, and CD103<sup>-</sup> CD11b<sup>+</sup> mDC among mDCs are shown

(*Tyk2<sup>+/+</sup>*, n=4; *Tyk2<sup>+/-</sup>*, n=6; *Tyk2<sup>-/-</sup>*, n=4). **d** Expression levels of MHC II (I-A<sup>g7</sup>) in the indicated types of DCs in the PLN of 6w mice (*Tyk2<sup>+/+</sup>*, n=4; *Tyk2<sup>+/-</sup>*, n=6; *Tyk2<sup>-/-</sup>*, n=4). **e** Expression levels of MHC I (H-2K<sup>d</sup>) in indicated types of DCs in the PLN of 6w mice (*Tyk2<sup>+/+</sup>*, n=4; *Tyk2<sup>+/-</sup>*, n=6; *Tyk2<sup>-/-</sup>*, n=4). **f** Expression levels of MHC I (H-2D<sup>b</sup>) in the indicated types of DCs in the PLN of 6w mice (*Tyk2<sup>+/+</sup>*, n=4; *Tyk2<sup>+/-</sup>*, n=6; *Tyk2<sup>-/-</sup>*, n=4). **g** Expression levels of MHC I (H-2K<sup>d</sup>) in CD8<sup>+</sup> rDC in the iLN or spleen of 6w mice (*Tyk2<sup>+/+</sup>*, n=5; *Tyk2<sup>+/-</sup>*, n=6; *Tyk2<sup>-/-</sup>*, n=5). **h** Expression levels of MHC I (H-2D<sup>b</sup>) in CD8<sup>+</sup> rDC in the iLN or spleen of 6w mice (*Tyk2<sup>+/+</sup>*, n=5; *Tyk2<sup>+/-</sup>*, n=6; *Tyk2<sup>-/-</sup>*, n=5). **i** Protein expression levels of CD40 or CD86 in CD8<sup>+</sup> rDCs in the PLN of 6w mice (*Tyk2<sup>+/+</sup>*, n=5; *Tyk2<sup>+/-</sup>*, n=5; *Tyk2<sup>-/-</sup>*, n=4). **j** GO biological process enrichment analysis of *Tyk2<sup>+/+</sup>* CD8<sup>+</sup> rDC vs *Tyk2<sup>-/-</sup>* CD8<sup>+</sup> rDC in the PLN. Selected terms enriched in the *Tyk2<sup>+/+</sup>* CD8<sup>+</sup> rDC are shown. **k** (Left) Representative histogram and (right) proliferation of CTV labeled 8.3 CD8<sup>+</sup> T cells after co-culture with CD8<sup>+</sup> rDC and NIT-1 cells for 3d. *P*-values were calculated using one-way ANOVA with Dunnett's posttest (c-i) and two-tailed Student's *t*-tests (k). Data represent the mean ± SEM.

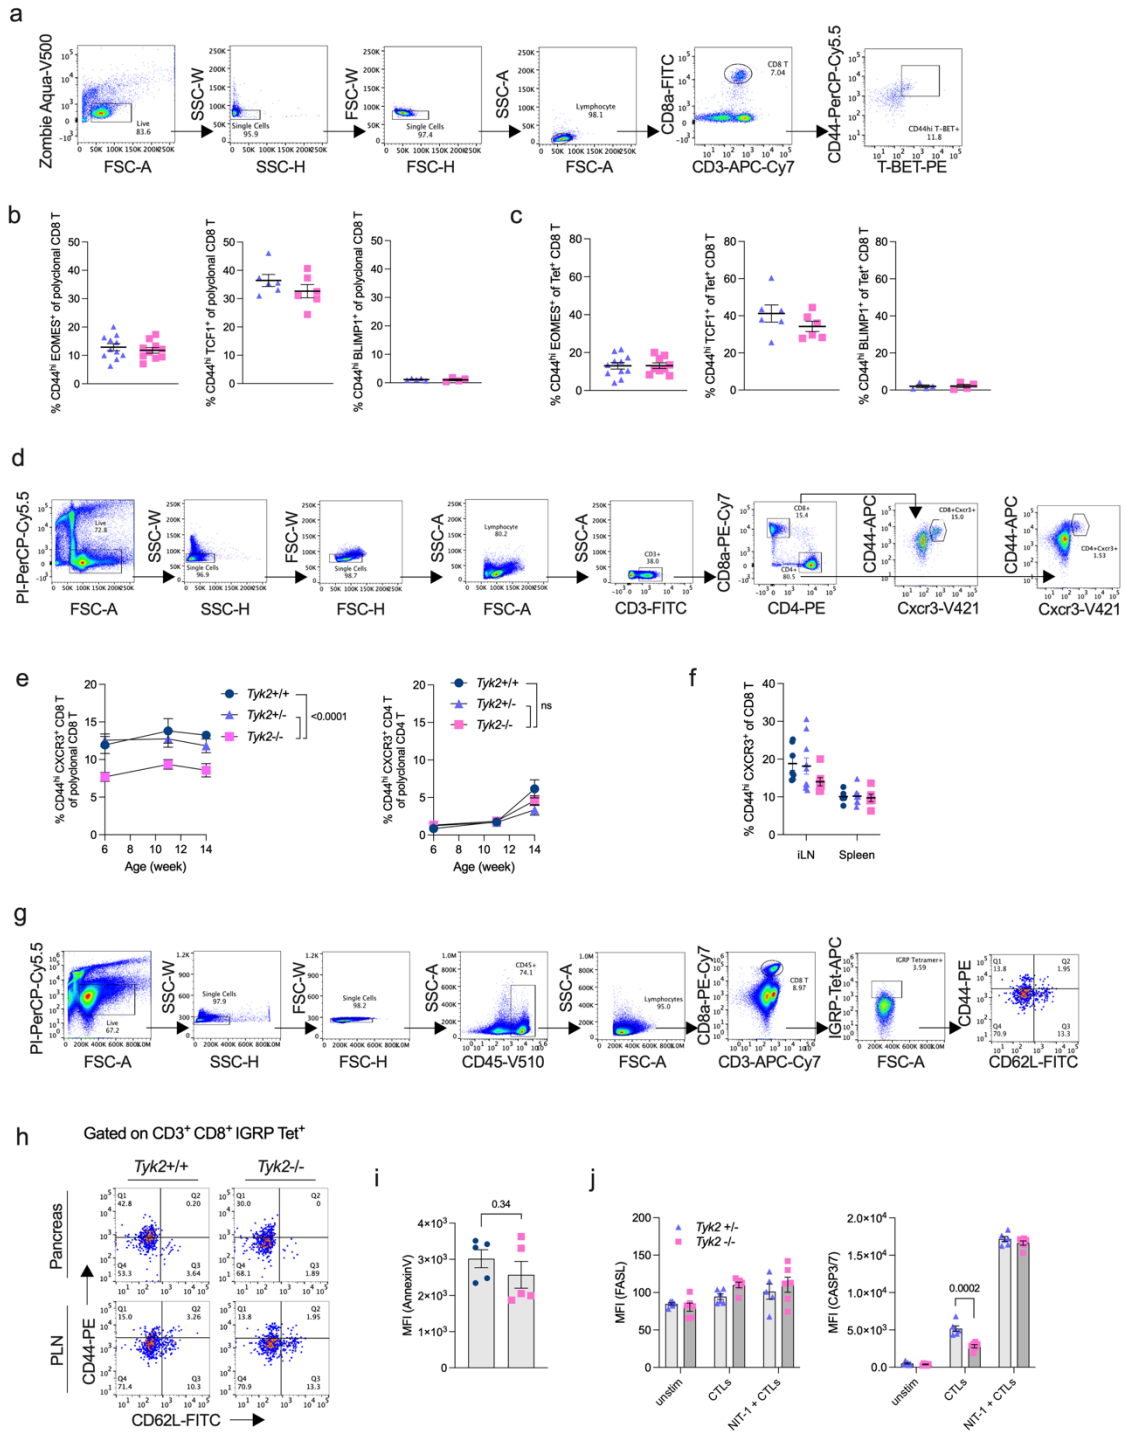

## Supplementary Figure 6. Characteristics of CD8<sup>+</sup> T cells in the PLN.

**a** Gating strategy for the analysis of transcription factors. **b** Frequency of CD44<sup>hi</sup> EOMES (*Tyk2*<sup>+/-</sup>, n=11; *Tyk2*<sup>-/-</sup>, n=9), TCF1 (*Tyk2*<sup>+/-</sup>, n=6; *Tyk2*<sup>-/-</sup>, n=6), or BLIMP1 (*Tyk2*<sup>+/-</sup>, n=5; *Tyk2*<sup>-/-</sup>, n=4)-positive CD8<sup>+</sup> T cells among polyclonal CD8<sup>+</sup> T cells in the PLN of 6w mice. **c** Frequency of CD44<sup>hi</sup> EOMES (*Tyk2*<sup>+/-</sup>, n=11; *Tyk2*<sup>-/-</sup>, n=9), TCF1 (*Tyk2*<sup>+/-</sup>, n=6; *Tyk2*<sup>-/-</sup>, n=6), or BLIMP1 (*Tyk2*<sup>+/-</sup>, n=5; *Tyk2*<sup>-/-</sup>, n=4)

-positive CD8<sup>+</sup> T cells among IGRP-specific CD8<sup>+</sup> T cells in the PLN of 6w mice. **d** Gating strategy for the analysis of CXCR3 in immune cells. **e** Frequency of polyclonal CD44<sup>hi</sup> CXCR3<sup>+</sup> CD8<sup>+</sup> T cells among CD8<sup>+</sup> T cells or CD44<sup>hi</sup> CXCR3<sup>+</sup> CD4<sup>+</sup> T cells among CD4<sup>+</sup> T cells in the PLN (CD8<sup>+</sup> T cells from 6w (*Tyk2*<sup>+/+</sup>, n=7; *Tyk2*<sup>+/-</sup>, n=5; *Tyk2*<sup>-/-</sup>, n=7); 11w (*Tyk2*<sup>+/+</sup>, n=3; *Tyk2*<sup>+/-</sup>, n=4; *Tyk2*<sup>-/-</sup>, n=8); and 14w (*Tyk2*<sup>+/+</sup>, n=3; *Tyk2*<sup>+/-</sup>, n=7; *Tyk2*<sup>-/-</sup>, n=4) mice; CD4<sup>+</sup> T cells from 6w (*Tyk2*<sup>+/+</sup>, n=7; *Tyk2*<sup>+/-</sup>, n=5; *Tyk2*<sup>-/-</sup>, n=7); 11w (*Tyk2*<sup>+/+</sup>, n=3; *Tyk2*<sup>+/-</sup>, n=4; *Tyk2*<sup>-/-</sup>, n=8); and 14w (*Tyk2*<sup>+/+</sup>, n=3; *Tyk2*<sup>+/-</sup>, n=4; *Tyk2*<sup>-/-</sup>, n=7) mice). **f** Frequency of polyclonal CD44<sup>hi</sup> CXCR3<sup>+</sup> CD8<sup>+</sup> T cells among CD8<sup>+</sup> T cells in the iLN (*Tyk2*<sup>+/+</sup>, n=7; *Tyk2*<sup>+/-</sup>, n=10; *Tyk2*<sup>-/-</sup>, n=7) or spleen (*Tyk2*<sup>+/+</sup>, n=5; *Tyk2*<sup>+/-</sup>, n=8; *Tyk2*<sup>-/-</sup>, n=6) of 6w mice. **g** Gating strategy for the analysis and sorting of IGRP-specific CD8<sup>+</sup> T cells. **h** Representative flow cytometry plots of CD44 and CD62L expressions in IGRP-specific CD8<sup>+</sup> T cells in the PLN and pancreas. **i** Annexin V binding in IGRP-specific CD8<sup>+</sup> T cells purified from the pancreas (10w *Tyk2*<sup>+/+</sup>, n=5; 15w *Tyk2*<sup>-/-</sup>, n=5). **j** Expression levels of FASL and active CASPASE-3/7 in unstimulated 8.3 CD8<sup>+</sup> T cells, *ex vivo*-activated 8.3 CD8<sup>+</sup> T cells, or *ex vivo*-activated 8.3 CD8<sup>+</sup> T cells cocultured with NIT-1 cells (*Tyk2*<sup>+/+</sup>, n=6, *Tyk2*<sup>-/-</sup>, n=6). Purified 8.3 CD8<sup>+</sup> T cells were activated with IL-2, IL-12, and CD3/28 beads for 3d. For the coculture experiment, *ex vivo*-activated 8.3 CD8<sup>+</sup> T cells were cultured with NIT-1 cells for 24h (CTLs:NIT-1=1:1). *P*-values were calculated using two-tailed Student's *t*-tests (b, c, i, and j), two-way ANOVA with Tukey's posttest (e and f). Data represent the mean ± SEM.

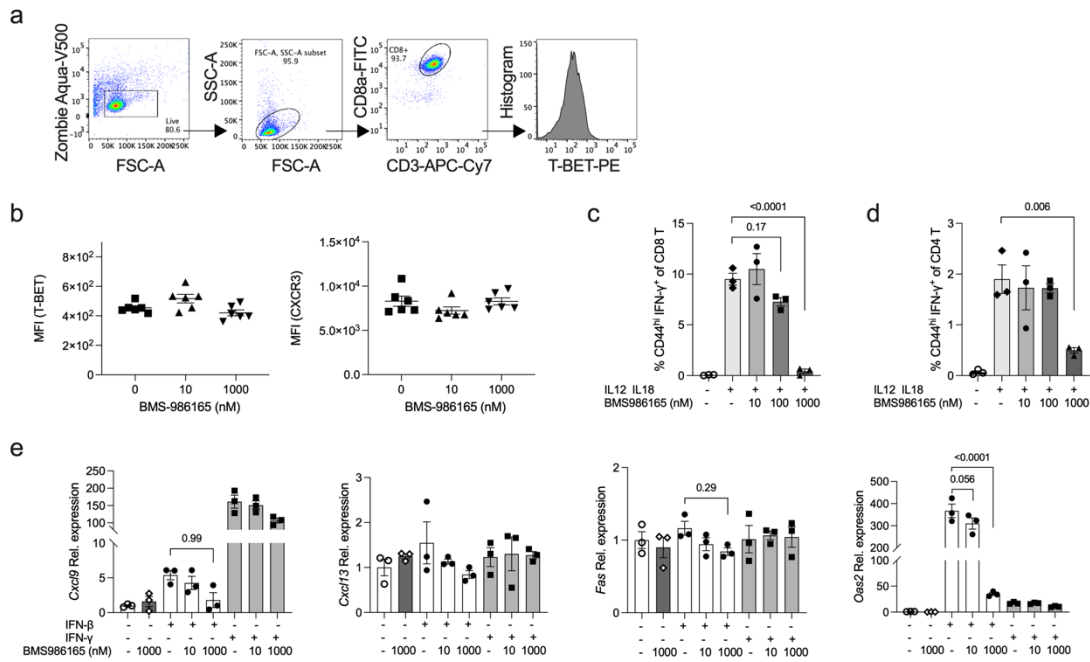

**Supplementary Figure 7. Effects of BMS-986165 treatment on CTLs, CD4<sup>+</sup> T cells, and NIT-1 cells.**

**a** Gating strategy for the analysis of T-BET expression. **b** Protein expression levels of T-BET and CXCR3 in *ex vivo*-stimulated *Tyk2*<sup>+/+</sup> CD8<sup>+</sup> T cells treated with BMS-986165 or vehicle for 2 days after priming. Purified CD8<sup>+</sup> T cells were activated with IL-2, IL-12, and CD3/28 beads for 3d. The activated CD8<sup>+</sup> T cells were re-cultured with BMS-986165 or vehicle for 2 days and the expressions of T-BET and CXCR3 were assessed. **c**, **d** Frequency of CD44<sup>hi</sup> IFN- $\gamma$ <sup>+</sup> cells among *Tyk2*<sup>+/+</sup> CD8<sup>+</sup> T cells (**c**) and *Tyk2*<sup>+/+</sup> CD4<sup>+</sup> T cells (**d**) after 20 ng/mL IL-12 and 20 ng/mL IL-18 treatment in the presence or absence of BMS-986165 for 24h. **e** Gene expression levels of *Cxcl9*, *Cxcl13*, *Fas*, and *Oas2* in NIT-1 cells stimulated with 100 U/mL IFN- $\beta$  or 0.1 ng/mL IFN- $\gamma$  in the presence or absence of BMS-986165. *P*-values were calculated using one-way ANOVA with Dunnett's posttest (**b-e**). Data represent the mean  $\pm$  SEM.

| Target name                  | Clone name | Manufacture               | Catalogue No. | Lot No.  | Dilution |
|------------------------------|------------|---------------------------|---------------|----------|----------|
| FITC anti-CD8a               | 53-6.7     | BioLegend                 | 100706        | B329760  | 1:200    |
| FITC anti-CD62L              | MEL-14     | BioLegend                 | 104406        | B324091  | 1:200    |
| FITC anti-CD4                | RM4-5      | eBioscience               | 11-0042-81    | 2278300  | 1:200    |
| FITC anti- RT1B(I-Ag7)       | OX-6       | BioLegend                 | 205305        | B293077  | 1:200    |
| PE anti-CD4                  | GK1.5      | BioLegend                 | 100408        | B315274  | 1:200    |
| PE anti-CD3                  | 500A2      | eBioscience               | 12-0033-81    | 1911672  | 1:200    |
| PE anti-FOXP3                | MF-14      | BioLegend                 | 126403        | B350966  | 1:100    |
| PE anti-IFN- $\gamma$        | XMG1.2     | BioLegend                 | 505807        | B303388  | 1:100    |
| PE anti-Ki67                 | 16A8       | BioLegend                 | 652403        | B293052  | 1:100    |
| PE anti-T-BET                | 4B10       | BioLegend                 | 644809        | B347808  | 1:100    |
| PE anti-BLIMP-1              | 5E7        | BioLegend                 | 150005        | B377137  | 1:100    |
| PE anti-CD40                 | 3/23       | BioLegend                 | 124609        | B353789  | 1:200    |
| PE anti-CD11b                | M1/70      | eBioscience               | 12-0112-82    | E014719  | 1:200    |
| PE anti-CD3                  | 500A2      | eBioscience               | 12-0033-81    | 1911672  | 1:200    |
| PE anti-CD44                 | 1M7        | eBioscience               | 12-0441-81    | E028485  | 1:200    |
| PE anti-TCF1                 | C63D9      | Cell Signaling Technology | C63D9         | 9        | 1:200    |
| PE AnnexinV                  | -          | BioLegend                 | 640907        | B405461  | 1:20     |
| PerCP Cy5.5 anti-CD3         | 17A2       | BioLegend                 | 100217        | B351063  | 1:200    |
| PerCP Cy5.5 anti-GZMB        | QA16A02    | BioLegend                 | 372211        | B357973  | 1:100    |
| PerCP Cy5.5 anti-CD44        | 1M7        | BioLegend                 | 103032        | B213817  | 1:200    |
| PerCP Cy5.5 anti-CD19        | 1D3        | eBioscience               | 45-0193-80    | 4300340  | 1:200    |
| APC anti-CD19                | 1D3        | BioLegend                 | 152409        | B285507  | 1:200    |
| APC anti-CD44                | 1M7        | BioLegend                 | 103012        | B325365  | 1:200    |
| APC anti-CD25                | PC61       | BioLegend                 | 102011        | B351503  | 1:200    |
| APC anti-CXCR3               | CXCR3-173  | BioLegend                 | 126511        | B391488  | 1:200    |
| APC anti-CD86                | GL-1       | BioLegend                 | 105011        | B346111  | 1:200    |
| APC anti-CD103               | 2E7        | BioLegend                 | 121413        | B356817  | 1:200    |
| APC anti-TCR $\gamma/\delta$ | GL3        | BioLegend                 | 118116        | B215599  | 1:200    |
| APC anti-H-2Db               | KH95       | BioLegend                 | 111513        | B351983  | 1:200    |
| APC MHC Tetramer H-2Kd       | -          | MBL                       | TB-M552-2     | T2110004 | 1:100    |
| Alexa Fluor 647 anti-IL17A   | TC11-18H10 | BD Biosciences            | 560184        | 3263593  | 1:100    |

|                                 |           |                |            |         |       |
|---------------------------------|-----------|----------------|------------|---------|-------|
| APC-Cy7 anti-CD3                | 17A2      | BioLegend      | 100222     | B324939 | 1:200 |
| APC-Cy7 anti-CD45               | 30-F11    | BioLegend      | 103116     | B345209 | 1:200 |
| APC-Cy7 anti-CD8a               | 53-6.7    | BioLegend      | 100713     | B374507 | 1:200 |
| PE-Cy7 anti-TCR $\gamma/\delta$ | GL3       | BioLegend      | 118124     | B291445 | 1:200 |
| PE-Cy7 anti-CD8a                | 53-6.7    | BioLegend      | 100721     | B364216 | 1:200 |
| PE-Cy7 anti-CD4                 | RM4-5     | BioLegend      | 100527     | B281901 | 1:200 |
| PE-Cy7 anti-CD11c               | N418      | eBioscience    | 25-0114-82 | 2295639 | 1:200 |
| PE-Cy7 anti-EOMES               | Dan11mag  | eBioscience    | 25-4875-80 | 2511279 | 1:100 |
| BV421 anti-H2-Kd                | SF-1.1    | BioLegend      | 116623     | B294310 | 1:200 |
| BV421 anti-CXCR3                | CXCR3-173 | BioLegend      | 126521     | B315428 | 1:200 |
| BV421 anti-CD103                | 2E7       | BioLegend      | 121421     | B366374 | 1:200 |
| BV450 anti-CD4                  | RM4-5     | BD Biosciences | 560468     | 5351553 | 1:200 |
| BV450 anti-CD11b                | M1/70     | BD Biosciences | 560456     | 50193   | 1:200 |
| BV510 anti-CD45                 | 30-F11    | BioLegend      | 103134     | B314484 | 1:200 |
| Purified anti-CD16/32           | 93        | BioLegend      | 101302     | B320249 | 1:500 |

**Supplementary Table 1. Antibodies information.**
