# Supplementary material for: TYK2 signaling promotes the development of autoreactive CD8+ cytotoxic T lymphocytes and type 1 diabetes
Source: PubMed Central journal article supplement (PMC10864272; doi:10.1038/s41467-024-45573-9), 2024-02-13
Supplement: 41467_2024_45573_MOESM3_ESM.pdf [file 41467_2024_45573_MOESM3_ESM.pdf]

## Reporting Summary

Nature Portfolio wishes to improve the reproducibility of the work that we publish. This form provides structure for consistency and transparency in reporting. For further information on Nature Portfolio policies, see our [Editorial Policies](#) and the [Editorial Policy Checklist](#).

### Statistics

For all statistical analyses, confirm that the following items are present in the figure legend, table legend, main text, or Methods section.

n/a | Confirmed

- The exact sample size ( $n$ ) for each experimental group/condition, given as a discrete number and unit of measurement
- A statement on whether measurements were taken from distinct samples or whether the same sample was measured repeatedly
- The statistical test(s) used AND whether they are one- or two-sided  
*Only common tests should be described solely by name; describe more complex techniques in the Methods section.*
- A description of all covariates tested
- A description of any assumptions or corrections, such as tests of normality and adjustment for multiple comparisons
- A full description of the statistical parameters including central tendency (e.g. means) or other basic estimates (e.g. regression coefficient) AND variation (e.g. standard deviation) or associated estimates of uncertainty (e.g. confidence intervals)
- For null hypothesis testing, the test statistic (e.g.  $F$ ,  $t$ ,  $r$ ) with confidence intervals, effect sizes, degrees of freedom and  $P$  value noted  
*Give  $P$  values as exact values whenever suitable.*
- For Bayesian analysis, information on the choice of priors and Markov chain Monte Carlo settings
- For hierarchical and complex designs, identification of the appropriate level for tests and full reporting of outcomes
- Estimates of effect sizes (e.g. Cohen's  $d$ , Pearson's  $r$ ), indicating how they were calculated

*Our web collection on [statistics for biologists](#) contains articles on many of the points above.*

### Software and code

Policy information about [availability of computer code](#)

Data collection

Flow Cytometry: FACSVerser (BD Biosciences), MA900 (Sony)  
RNA-sequencing: Illumina NovaSeq 6000 on a 150bp paired-end with a coverage of 40M reads per sample  
Microarray: Affymetrix Mouse Transcriptome Array 1.0

Data analysis

Flow Cytometry: FlowJo (10.6.1)

Transcriptomics (RNA-sequencing):

- R (3.6)
- RStudio (2023.06.1+524)
- NovaSeq Control Software (1.7.5)
- Real Time Analysis (RTA) (3.4.4)
- bcl2fastq2 (2.20)
- DRAGEN Bio-IT Platform (3.9.3)
- GeneTrail (3.2)
- RNASeqChef (1.0.7)
- ggVolcanoR (<https://ggvolcanor.erc.monash.edu/>)

Transcriptomics (Microarray):

- R (3.6)
- RStudio (2023.06.1+524)
- Agilent 4150 TapeStation (4.1)

-Expression Console (1.4)  
 -GeneTrail (3.2)  
 -ClustVis (2.0)

For manuscripts utilizing custom algorithms or software that are central to the research but not yet described in published literature, software must be made available to editors and reviewers. We strongly encourage code deposition in a community repository (e.g. GitHub). See the Nature Portfolio [guidelines for submitting code & software](#) for further information.

## Data

Policy information about [availability of data](#)

All manuscripts must include a [data availability statement](#). This statement should provide the following information, where applicable:

- Accession codes, unique identifiers, or web links for publicly available datasets
- A description of any restrictions on data availability
- For clinical datasets or third party data, please ensure that the statement adheres to our [policy](#)

All data analysed in this study are included in this article and supplementary information, or have been made available in public repositories. Raw microarray data are available from the Gene Expression Omnibus (GEO) repository (GSE235670) (<https://www.ncbi.nlm.nih.gov/geo/query/acc.cgi?acc=GSE235670>). Raw sequence reads data are available from the Sequence Read Archive (SRA) repository (PRJNA992677) (<https://www.ncbi.nlm.nih.gov/bioproject/PRJNA992677/>). Flow cytometry data have been deposited in the Mendeley Data under DOI: 10.17632/b5bybfdnn.1 [<https://data.mendeley.com/datasets/b5bybfdnn/1>].

## Research involving human participants, their data, or biological material

Policy information about studies with [human participants or human data](#). See also policy information about [sex, gender \(identity/presentation\), and sexual orientation](#) and [race, ethnicity and racism](#).

|                                                                    |      |
|--------------------------------------------------------------------|------|
| Reporting on sex and gender                                        | n.a. |
| Reporting on race, ethnicity, or other socially relevant groupings | n.a. |
| Population characteristics                                         | n.a. |
| Recruitment                                                        | n.a. |
| Ethics oversight                                                   | n.a. |

Note that full information on the approval of the study protocol must also be provided in the manuscript.

## Field-specific reporting

Please select the one below that is the best fit for your research. If you are not sure, read the appropriate sections before making your selection.

Life sciences  Behavioural & social sciences  Ecological, evolutionary & environmental sciences

For a reference copy of the document with all sections, see [nature.com/documents/nr-reporting-summary-flat.pdf](https://nature.com/documents/nr-reporting-summary-flat.pdf)

## Life sciences study design

All studies must disclose on these points even when the disclosure is negative.

|                 |                                                                                                                                                                                                                                                                                                                                                                       |
|-----------------|-----------------------------------------------------------------------------------------------------------------------------------------------------------------------------------------------------------------------------------------------------------------------------------------------------------------------------------------------------------------------|
| Sample size     | We did not use a priori statistical methods to determine the sample size. Sample size sufficiency was based on previous experiments from our laboratory and others: Gearty, S. V. et al. An autoimmune stem-like CD8 T cell population drives type 1 diabetes. Nature 602, 156–161 (2022).                                                                            |
| Data exclusions | No data were excluded when analyzing data. All analyzed mice and samples were included for analysis.                                                                                                                                                                                                                                                                  |
| Replication     | All data were reproduced and compiled from independent experiments in figures and statistical analysis.                                                                                                                                                                                                                                                               |
| Randomization   | Mice (wild type; heterozygous KO; homozygous KO) were housed in co-housed conditions after weaning to minimize the effect of different gut microbiota composition on diabetes development. The number of WT, hetero KO, homo KO mice was balanced in co-housing cages. Mice receiving donor splenocytes of different origins were randomly co-house in the same cage. |
| Blinding        | We were not blinded to the allocation of mice, samples, and data analyses, to balance the co-housed conditions and to minimize the effect of different gut microbiota composition.                                                                                                                                                                                    |

## Reporting for specific materials, systems and methods

## Materials & experimental systems

| n/a                                 | Involved in the study                                           |
|-------------------------------------|-----------------------------------------------------------------|
| <input type="checkbox"/>            | <input checked="" type="checkbox"/> Antibodies                  |
| <input type="checkbox"/>            | <input checked="" type="checkbox"/> Eukaryotic cell lines       |
| <input checked="" type="checkbox"/> | <input type="checkbox"/> Palaeontology and archaeology          |
| <input type="checkbox"/>            | <input checked="" type="checkbox"/> Animals and other organisms |
| <input checked="" type="checkbox"/> | <input type="checkbox"/> Clinical data                          |
| <input checked="" type="checkbox"/> | <input type="checkbox"/> Dual use research of concern           |
| <input checked="" type="checkbox"/> | <input type="checkbox"/> Plants                                 |

## Methods

| n/a                                 | Involved in the study                              |
|-------------------------------------|----------------------------------------------------|
| <input checked="" type="checkbox"/> | <input type="checkbox"/> ChIP-seq                  |
| <input type="checkbox"/>            | <input checked="" type="checkbox"/> Flow cytometry |
| <input checked="" type="checkbox"/> | <input type="checkbox"/> MRI-based neuroimaging    |

## Antibodies

### Antibodies used

Target name / Clone name / Manufacture / Catalogue No. / Lot No.

FITC anti-CD8a / 53-6.7 / BioLegend / 100706 / B329760  
 FITC anti-CD62L / MEL-14 / BioLegend / 104406 / B324091  
 FITC anti-CD4 / RM4-5 / eBioscience / 11-0042-81 / 2278300  
 FITC anti- RT1B(I-Ag7) / OX-6 / BioLegend / 205305 / B293077  
 PE anti-CD4 / GK1.5 / BioLegend / 100408 / B315274  
 PE anti-CD3 / 500A2 / eBioscience / 12-0033-81 / 1911672  
 PE anti-FOXP3 / MF-14 / BioLegend / 126403 / B350966  
 PE anti-IFN- $\gamma$  / XMG1.2 / BioLegend / 505807 / B303388  
 PE anti-Ki67 / 16A8 / BioLegend / 652403 / B293052  
 PE anti-T-BET / 4B10 / BioLegend / 644809 / B347808  
 PE anti-BLIMP-1 / 5E7 / BioLegend / 150005 / B377137  
 PE anti-CD40 / 3/23 / BioLegend / 124609 / B353789  
 PE anti-CD11b / M1/70 / eBioscience / 12-0112-82 / E014719  
 PE anti-CD3 / 500A2 / eBioscience / 12-0033-81 / 1911672  
 PE anti-CD44 / 1M7 / eBioscience / 12-0441-81 / E028485  
 PE anti-TCF1 / C63D9 / Cell Signaling Technology / C63D9 / 9  
 PE AnnexinV/BioLegend/640907/B405461  
 PerCP Cy5.5 anti-CD3 / 17A2 / BioLegend / 100217 / B351063  
 PerCP Cy5.5 anti-GZMB / QA16A02 / BioLegend / 372211 / B357973  
 PerCP Cy5.5 anti-CD44 / 1M7 / BioLegend / 103032 / B213817  
 PerCP Cy5.5 anti-CD19 / 1D3 / eBioscience / 45-0193-80 / 4300340  
 APC anti-CD19 / 1D3 / BioLegend / 152409 / B285507  
 APC anti-CD44 / 1M7 / BioLegend / 103012 / B325365  
 APC anti-CD25 / PC61 / BioLegend / 102011 / B351503  
 APC anti-CXCR3 / CXCR3-173 / BioLegend / 126511 / B391488  
 APC anti-CD86 / GL-1 / BioLegend / 105011 / B346111  
 APC anti-CD103 / 2E7 / BioLegend / 121413 / B356817  
 APC anti-TCR  $\gamma/\delta$  / GL3 / BioLegend / 118116 / B215599  
 APC anti-H-2Db / KH95 / BioLegend / 111513 / B351983  
 APC MHC Tetramer H-2Kd / - / MBL / TB-M552-2 / T2110004  
 Alexa Fluor 647 anti-IL17A / TC11-18H10 / BD Biosciences / 560184 / 3263593  
 APC-Cy7 anti-CD3 / 17A2 / BioLegend / 100222 / B324939  
 APC-Cy7 anti-CD45 / 30-F11 / BioLegend / 103116 / B345209  
 APC-Cy7 anti-CD8a / 53-6.7 / BioLegend / 100713 / B374507  
 PE-Cy7 anti-TCR  $\gamma/\delta$  / GL3 / BioLegend / 118124 / B291445  
 PE-Cy7 anti-CD8a / 53-6.7 / BioLegend / 100721 / B364216  
 PE-Cy7 anti-CD4 / RM4-5 / BioLegend / 100527 / B281901  
 PE-Cy7 anti-CD11c / N418 / eBioscience / 25-0114-82 / 2295639  
 PE-Cy7 anti-EOMES / Dan11mag / eBioscience / 25-4875-80 / 2511279  
 BV421 anti-H2-Kd / SF-1.1 / BioLegend / 116623 / B294310  
 BV421 anti-CXCR3 / CXCR3-173 / BioLegend / 126521 / B315428  
 BV421 anti-CD103 / 2E7 / BioLegend / 121421 / B366374  
 BV450 anti-CD4 / RM4-5 / BD Biosciences / 560468 / 5351553  
 BV450 anti-CD11b / M1/70 / BD Biosciences / 560456 / 0050193  
 BV510 anti-CD45 / 30-F11 / BioLegend / 103134 / B314484  
 Purified anti-CD16/32 / 93 / BioLegend / 101302 / B320249

Dead cells were excluded using Zombie aqua fixable viability kit (BioLegend) or propidium iodide (Fujifilm). Annexin V staining was performed with Annexin V binding buffer (BioLegend).

Antibodies information with dilution is shown in Supplementary Table 1.

### Validation

We have relied on validation provided by suppliers for all primary antibodies we used in this study.

## Target name / URL

FITC anti-CD8a / <https://www.biolegend.com/ja-jp/products/fitc-anti-mouse-cd8a-antibody-153?GroupID=BLG2559>  
 FITC anti-CD62L / <https://www.biolegend.com/ja-jp/products/fitc-anti-mouse-cd62l-antibody-384?GroupID=BLG10714>  
 FITC anti-CD4 / <https://www.thermofisher.com/antibody/product/CD4-Antibody-clone-RM4-5-Monoclonal/11-0042-82>  
 FITC anti- RT1B(I-Ag7) / <https://www.biolegend.com/ja-jp/products/fitc-anti-rat-rt1b-antibody-5721?GroupID=GROUP27>  
 PE anti-CD4 / <https://www.biolegend.com/ja-jp/products/pe-anti-mouse-cd4-antibody-250?GroupID=BLG4745>  
 PE anti-CD3 / <https://www.thermofisher.com/antibody/product/CD3e-Antibody-clone-eBio500A2-500A2-Monoclonal/12-0033-82>  
 PE anti-FOXP3 / <https://www.biolegend.com/ja-jp/products/pe-anti-mouse-foxp3-antibody-4660?GroupID=BLG5706>  
 PE anti-IFN- $\gamma$  / <https://www.biolegend.com/ja-jp/products/pe-anti-mouse-ifn-gamma-antibody-997?GroupID=GROUP24>  
 PE anti-Ki67 / <https://www.biolegend.com/ja-jp/products/pe-anti-mouse-ki-67-antibody-8134>  
 PE anti-T-BET / <https://www.biolegend.com/ja-jp/products/pe-anti-t-bet-antibody-6347?GroupID=BLG6433>  
 PE anti-BLIMP-1 / <https://www.biolegend.com/ja-jp/products/pe-anti-mouse-blimp-1-antibody-12328?GroupID=BLG14433>  
 PE anti-CD40 / <https://www.biolegend.com/ja-jp/clone-search/pe-anti-mouse-cd40-antibody-4983?GroupID=BLG5890>  
 PE anti-CD11b / <https://www.thermofisher.com/antibody/product/CD11b-Antibody-clone-M1-70-Monoclonal/12-0112-82>  
 PE anti-CD3 / <https://www.thermofisher.com/antibody/product/CD3e-Antibody-clone-eBio500A2-500A2-Monoclonal/12-0033-82>  
 PE anti-CD44 / <https://www.thermofisher.com/antibody/product/CD44-Antibody-clone-IM7-Monoclonal/12-0441-82>  
 PE anti-TCF1 / <https://www.cellsignal.jp/products/antibody-conjugates/tcf1-tcf7-c63d9-rabbit-mab-pe-conjugate/14456>  
 PE AnnexinV / <https://www.biolegend.com/ja-jp/productstab/pe-annexin-v-8145>  
 PerCP Cy5.5 anti-CD3 / <https://www.biolegend.com/ja-jp/products/percp-cyanine5-5-anti-mouse-cd3-antibody-5596?GroupID=BLG242>  
 PerCP Cy5.5 anti-GZMB / <https://www.biolegend.com/ja-jp/products/percp-cyanine5-5-anti-humanmouse-granzyme-b-recombinant-antibody-15597?GroupID=GROUP28>  
 PerCP Cy5.5 anti-CD44 / <https://www.biolegend.com/ja-jp/products/percp-cyanine5-5-anti-mouse-human-cd44-antibody-5605?GroupID=BLG10248>  
 PerCP Cy5.5 anti-CD19 / <https://www.thermofisher.com/antibody/product/CD19-Antibody-clone-eBio1D3-1D3-Monoclonal/45-0193-82>  
 APC anti-CD19 / <https://www.biolegend.com/ja-jp/products/apc-anti-mouse-cd19-antibody-13680>  
 APC anti-CD44 / <https://www.biolegend.com/ja-jp/products/apc-anti-mouse-human-cd44-antibody-312?GroupID=BLG10425>  
 APC anti-CD25 / <https://www.biolegend.com/ja-jp/products/apc-anti-mouse-cd25-antibody-420?GroupID=BLG10428>  
 APC anti-CXCR3 / <https://www.biolegend.com/ja-jp/products/apc-anti-mouse-cd183-cxcr3-antibody-4683?GroupID=BLG5657>  
 APC anti-CD86 / <https://www.biolegend.com/ja-jp/products/apc-anti-mouse-cd86-antibody-2896?GroupID=BLG10719>  
 APC anti-CD103 / <https://www.biolegend.com/ja-jp/products/apc-anti-mouse-cd103-antibody-4914?GroupID=BLG4646>  
 APC anti-TCR  $\gamma/\delta$  / <https://www.biolegend.com/ja-jp/search-results/apc-anti-mouse-tcr-gamma-delta-antibody-6061?GroupID=BLG3687>  
 APC anti-H-2Db / <https://www.biolegend.com/ja-jp/products/apc-anti-mouse-h-2d-b-antibody-11947?GroupID=GROUP20>  
 APC MHC Tetramer H-2Kd / <https://ruo.mbl.co.jp/bio/dtl/T/index.html?pcd=TB-M552-2>  
 Alexa Fluor 647 anti-IL17A / <https://www.bdbiosciences.com/ja-jp/products/reagents/flow-cytometry-reagents/research-reagents/single-color-antibodies-ruo/alexa-fluor-647-rat-anti-mouse-il-17a.560184>  
 APC-Cy7 anti-CD3 / <https://www.biolegend.com/ja-jp/explore-new-products/apc-cyanine7-anti-mouse-cd3-antibody-6068?GroupID=BLG242>  
 APC-Cy7 anti-CD45 / <https://www.biolegend.com/ja-jp/products/apc-cyanine7-anti-mouse-cd45-antibody-2530?GroupID=BLG1932>  
 APC-Cy7 anti-CD8a / <https://www.biolegend.com/ja-jp/products/apc-cyanine7-anti-mouse-cd8a-antibody-2269?GroupID=BLG279>  
 PE-Cy7 anti-TCR  $\gamma/\delta$  / <https://www.biolegend.com/ja-jp/products/pe-cyanine7-anti-mouse-tcr-gamma-delta-antibody-7822?GroupID=BLG8973>  
 PE-Cy7 anti-CD8a / <https://www.biolegend.com/ja-jp/productstab/pe-cyanine7-anti-mouse-cd8a-antibody-1906?GroupID=BLG2559>  
 PE-Cy7 anti-CD4 / <https://www.biolegend.com/ja-jp/products/pe-cyanine7-anti-mouse-cd4-antibody-1932?GroupID=BLG4211>  
 PE-Cy7 anti-CD11c / <https://www.thermofisher.com/antibody/product/CD11c-Antibody-clone-N418-Monoclonal/25-0114-82>  
 PE-Cy7 anti-EOMES / <https://www.thermofisher.com/antibody/product/EOMES-Antibody-clone-Dan11mag-Monoclonal/25-4875-82>  
 BV421 anti-H2-Kd / <https://www.biolegend.com/ja-jp/products/brilliant-violet-421-anti-mouse-h-2kd-antibody-11960?Clone=SF1-1.1>  
 BV421 anti-CXCR3 / <https://www.biolegend.com/ja-jp/products/brilliant-violet-421-anti-mouse-cd183-cxcr3-antibody-7159?GroupID=BLG10642>  
 BV421 anti-CD103 / <https://www.biolegend.com/ja-jp/products/brilliant-violet-421-anti-mouse-cd103-antibody-7329?GroupID=BLG4648>  
 BV450 anti-CD4 / <https://www.bdbiosciences.com/ja-jp/products/reagents/flow-cytometry-reagents/research-reagents/single-color-antibodies-ruo/v450-rat-anti-mouse-cd4.560468>  
 BV450 anti-CD11b / <https://www.bdbiosciences.com/ja-jp/products/reagents/flow-cytometry-reagents/research-reagents/single-color-antibodies-ruo/v450-rat-anti-cd11b.560455>  
 BV510 anti-CD45 / <https://www.biolegend.com/ja-jp/products/brilliant-violet-510-anti-mouse-cd45-antibody-7995>  
 Purified anti-CD16/32 / <https://www.biolegend.com/ja-jp/products/purified-anti-mouse-cd16-32-antibody-190?GroupID=BLG9237>

## Eukaryotic cell lines

Policy information about [cell lines and Sex and Gender in Research](#)

|                                                                      |                                                                                                                                                                                          |
|----------------------------------------------------------------------|------------------------------------------------------------------------------------------------------------------------------------------------------------------------------------------|
| Cell line source(s)                                                  | NIT-1: We obtained NIT-1 cells from ATCC (CRL-2055). NIT-1 is a pancreatic beta cell line that was isolated from the islet of langerhans of a 10-week-old, female mouse with insulinoma. |
| Authentication                                                       | The cell lines was not authenticated.                                                                                                                                                    |
| Mycoplasma contamination                                             | Contamination of Mycoplasma was not detected.                                                                                                                                            |
| Commonly misidentified lines<br>(See <a href="#">ICLAC</a> register) | The cell lines was not listed in Commonly misidentified lines.                                                                                                                           |

## Animals and other research organisms

Policy information about [studies involving animals](#); [ARRIVE guidelines](#) recommended for reporting animal research, and [Sex and Gender in Research](#)

|                         |                                                                                                                                                                                                                                                                                                                                                                                                                                                                                                                                                                                                                                                                                                                                                                         |
|-------------------------|-------------------------------------------------------------------------------------------------------------------------------------------------------------------------------------------------------------------------------------------------------------------------------------------------------------------------------------------------------------------------------------------------------------------------------------------------------------------------------------------------------------------------------------------------------------------------------------------------------------------------------------------------------------------------------------------------------------------------------------------------------------------------|
| Laboratory animals      | NOD/sh1Jcl mice were purchased from CLEA Japan. NOD/SCID mice were purchased from the Jackson laboratory Japan. NY8.3-NOD mice were provided by S. Akazawa and N. Abiru (Nagasaki University, Nagasaki, Japan) with permission from the Jackson laboratory. Tyk2 knockout mice were provided by K. Shimoda (University of Miyazaki, Miyazaki, Japan). Tyk2KO/NOD mice and Tyk2KO/NY8.3-NOD mice were generated in-house. All mice were maintained on a 12-hour light/dark cycle in a temperature-controlled facility under specific pathogen-free conditions at 23±2°C with 50±10% humidity, and provided with sterile food and water ad libitum. SCID mice were fed with sterile water. We used 6-7w, 10-12w, 14w, 24w of age mice as indicated in the figure legends. |
| Wild animals            | None.                                                                                                                                                                                                                                                                                                                                                                                                                                                                                                                                                                                                                                                                                                                                                                   |
| Reporting on sex        | We used female mice in all experiments because the incidence of autoimmune diabetes is more prevalent in female NOD mice.                                                                                                                                                                                                                                                                                                                                                                                                                                                                                                                                                                                                                                               |
| Field-collected samples | None.                                                                                                                                                                                                                                                                                                                                                                                                                                                                                                                                                                                                                                                                                                                                                                   |
| Ethics oversight        | All animal experiments were approved by the Saga University Animal Care and Use Committee and conducted in accordance with the regulations on animal experimentation at Saga University (Approval No. A2019-047-0, A2021-007-0, A2021-023-0, A2022-044-0, A2022-045-1).                                                                                                                                                                                                                                                                                                                                                                                                                                                                                                 |

Note that full information on the approval of the study protocol must also be provided in the manuscript.

## Flow Cytometry

### Plots

Confirm that:

- The axis labels state the marker and fluorochrome used (e.g. CD4-FITC).
- The axis scales are clearly visible. Include numbers along axes only for bottom left plot of group (a 'group' is an analysis of identical markers).
- All plots are contour plots with outliers or pseudocolor plots.
- A numerical value for number of cells or percentage (with statistics) is provided.

### Methodology

|                           |                                                                                                                                                                                                                                                                                                                                                                                                                                                                                                                                                                                                                                                                                                                                                                                                                                                                                                                                                                                                                                                                                                                                                                                                                                                                                                                                                                                                                                                                                                                                                                                                                                                                                                                                                                                                                                                                                                                                                                                                                                                                                                                                                                                                                                                                                                                                                                                                             |
|---------------------------|-------------------------------------------------------------------------------------------------------------------------------------------------------------------------------------------------------------------------------------------------------------------------------------------------------------------------------------------------------------------------------------------------------------------------------------------------------------------------------------------------------------------------------------------------------------------------------------------------------------------------------------------------------------------------------------------------------------------------------------------------------------------------------------------------------------------------------------------------------------------------------------------------------------------------------------------------------------------------------------------------------------------------------------------------------------------------------------------------------------------------------------------------------------------------------------------------------------------------------------------------------------------------------------------------------------------------------------------------------------------------------------------------------------------------------------------------------------------------------------------------------------------------------------------------------------------------------------------------------------------------------------------------------------------------------------------------------------------------------------------------------------------------------------------------------------------------------------------------------------------------------------------------------------------------------------------------------------------------------------------------------------------------------------------------------------------------------------------------------------------------------------------------------------------------------------------------------------------------------------------------------------------------------------------------------------------------------------------------------------------------------------------------------------|
| Sample preparation        | <p>To isolate immune cells from the LNs, thymus, or spleen, tissues were minced and enzymatically dissociated with 1 mg/mL collagenase D and 25 U/mL DNase I in DMEM for 30 min at 37°C. The digested tissues were filtered through a 70-µm cell strainer with a syringe plunger. Red blood cell lysis was performed by incubation with ammonium-chloride-potassium lysis buffer for 4 min on ice. Isolated cells were preincubated with CD16/32 blocker for 5 minutes at 4°C to prevent nonspecific staining, and stained for 20 min at 4°C with antibodies. We added 1 mg/mL propidium iodide to the cell suspension to exclude dead cells.</p> <p>To isolate immune cells from the pancreas, pancreases were perfused with 1 mg/mL collagenase D and 0.5 mg/mL Trypsin inhibitor and 25 U/mL DNase I through the bile duct. The perfused pancreas was removed carefully from the intestine, stomach, spleen, and LNs, and dissociated for 30 min at 37°C. Then, 5 mL of DMEM containing 10% FBS and 1% PcSM was added to the dissociated pancreas and shaken for 10 seconds to completely dissociate the tissue. The digested pancreas was filtered through a 70-µm cell strainer with a syringe plunger. Red blood cell lysis was performed by incubation with ammonium-chloride-potassium lysis buffer for 4 min on ice. The digested pancreas was centrifuged and resuspended in 40% Percoll layered on 70% Percoll, and centrifuged at 2200 rpm for 20 min. Cells were collected from the Percoll interface. Isolated cells were preincubated with CD16/32 blocker for 5 minutes at 4°C to prevent nonspecific staining, and stained for 20 min at 4°C with antibodies. We added 1 mg/mL propidium iodide to the cell suspension to exclude dead cells.</p> <p>To stain IFN-γ and IL-17A, cells were stimulated with 25 ng/mL PMA and 1 mg/mL ionomycin for 6 hours at 37°C. Then, 10 mg/mL Brefeldin A was added for the last 5 hours of incubation. Intracellular staining was performed using a Cytofix/Cytoperm Fixation/Permeabilization Solution kit according to the manufacturer's instructions. The intracellular staining of FOXP3, KI67, T-BET, EOMES, TCF-1, GZMB, and BLIMP-1, was performed using the Foxp3/Transcription factor staining buffer set according to the manufacturer's instructions. Dead cells were excluded using a Zombie Aqua fixable viability kit (BioLegend).</p> |
| Instrument                | Data were obtained using FACSVerse (BD Bioscience) and MA900 (Sony).                                                                                                                                                                                                                                                                                                                                                                                                                                                                                                                                                                                                                                                                                                                                                                                                                                                                                                                                                                                                                                                                                                                                                                                                                                                                                                                                                                                                                                                                                                                                                                                                                                                                                                                                                                                                                                                                                                                                                                                                                                                                                                                                                                                                                                                                                                                                        |
| Software                  | Data were analyzed using FlowJo (10.6.1).                                                                                                                                                                                                                                                                                                                                                                                                                                                                                                                                                                                                                                                                                                                                                                                                                                                                                                                                                                                                                                                                                                                                                                                                                                                                                                                                                                                                                                                                                                                                                                                                                                                                                                                                                                                                                                                                                                                                                                                                                                                                                                                                                                                                                                                                                                                                                                   |
| Cell population abundance | The abundance of cell populations were calculated by FlowJo software. The absolute number of cells was calculated by multiplying the number of original cell suspensions by the parentage of the cell population calculated by FlowJo.                                                                                                                                                                                                                                                                                                                                                                                                                                                                                                                                                                                                                                                                                                                                                                                                                                                                                                                                                                                                                                                                                                                                                                                                                                                                                                                                                                                                                                                                                                                                                                                                                                                                                                                                                                                                                                                                                                                                                                                                                                                                                                                                                                      |

Gating strategy

First, live cells were defined by propidium iodide or Zombie aqua dye staining. Single cells were selected by SSC-W and SSC-H plots. Single cells were selected again by FSC-W and FSC-H plots. Gating strategies were provided in the supplementary figure 2.

Tick this box to confirm that a figure exemplifying the gating strategy is provided in the Supplementary Information.
